# Supplementary material for: Daily Duration of Eating for Children and Adolescents: A Systematic Review and Meta-Analysis
Source: MDPI journal article supplement (doi:10.3390/nu16070993), 2024-03-28
Supplement: s1 [file s1]

**Table S1.** Embase search syntax

| Row number | Search term (February 2013 to February 2023)                                                                                                                                                                                                               | Number of studies |
|------------|------------------------------------------------------------------------------------------------------------------------------------------------------------------------------------------------------------------------------------------------------------|-------------------|
| 1          | child/                                                                                                                                                                                                                                                     | 1944271           |
| 2          | adolescent/                                                                                                                                                                                                                                                | 1672356           |
| 3          | teen*.tw.                                                                                                                                                                                                                                                  | 46584             |
| 4          | (pediatric* or paediatric*).tw.                                                                                                                                                                                                                            | 673321            |
| 5          | adolescen*.tw.                                                                                                                                                                                                                                             | 434047            |
| 6          | juvenile/                                                                                                                                                                                                                                                  | 55237             |
| 7          | child*.tw.                                                                                                                                                                                                                                                 | 1944218           |
| 8          | infant*.tw.                                                                                                                                                                                                                                                | 497304            |
| 9          | youth*.tw.                                                                                                                                                                                                                                                 | 113614            |
| 10         | juvenile*.tw.                                                                                                                                                                                                                                              | 106873            |
| 11         | 1 or 2 or 3 or 4 or 5 or 6 or 7 or 8 or 9 or 10                                                                                                                                                                                                            | 4040869           |
| 12         | feeding behavior/                                                                                                                                                                                                                                          | 84275             |
| 13         | fasting/                                                                                                                                                                                                                                                   | 20946             |
| 14         | eating/                                                                                                                                                                                                                                                    | 40463             |
| 15         | meal/                                                                                                                                                                                                                                                      | 21254             |
| 16         | (eat* or feed* or fasting or meal*).tw.                                                                                                                                                                                                                    | 975436            |
| 17         | 12 or 13 or 14 or 15 or 16                                                                                                                                                                                                                                 | 1021574           |
| 18         | time factor/                                                                                                                                                                                                                                               | 45037             |
| 19         | circadian rhythm/                                                                                                                                                                                                                                          | 91704             |
| 20         | (time* or timing* or circadian or mealtime* or meal-time* or duration* or daily or nightly or intermittent).tw.                                                                                                                                            | 7365827           |
| 21         | 18 or 19 or 20                                                                                                                                                                                                                                             | 7407743           |
| 22         | (feeding behavior/ or fasting/ or eating/ or meal/ or (eat* or feed* or fasting or meal*).tw.) adj2 (time factor/ or circadian rhythm/ or (time* or timing* or circadian or mealtime* or meal-time* or duration* or daily or nightly or intermittent).tw.) | 47107             |
| 23         | intermittent fasting/                                                                                                                                                                                                                                      | 994               |
| 24         | time restricted feeding/                                                                                                                                                                                                                                   | 482               |
| 25         | (chrononutrition or chrono-nutrition or time-restricted feeding or time restricted feeding).tw.                                                                                                                                                            | 633               |
| 26         | 23 or 24 or 25                                                                                                                                                                                                                                             | 1695              |
| 27         | 22 or 26                                                                                                                                                                                                                                                   | 47406             |
| 28         | 11 and 27                                                                                                                                                                                                                                                  | 10069             |
| 29         | (rat* or mice or mouse or drosophila).tw.                                                                                                                                                                                                                  | 9763563           |
| 30         | animal/                                                                                                                                                                                                                                                    | 1464150           |
| 31         | 29 or 30                                                                                                                                                                                                                                                   | 10748881          |
| 32         | 28 not 31                                                                                                                                                                                                                                                  | 6916              |
| 33         | exp eating disorder/                                                                                                                                                                                                                                       | 60283             |
| 34         | (anorexia or avoidant restrictive food intake disorder or ARFID or binge-eating disorder or bulimia or orthorexia).tw.                                                                                                                                     | 53478             |
| 35         | 33 or 34                                                                                                                                                                                                                                                   | 88073             |
| 36         | 32 not 35                                                                                                                                                                                                                                                  | 6609              |
| 37         | exp athlete/                                                                                                                                                                                                                                               | 73440             |

|    |                                                                              |         |
|----|------------------------------------------------------------------------------|---------|
| 38 | athlete*.tw.                                                                 | 75723   |
| 39 | 37 or 38                                                                     | 100428  |
| 40 | 36 not 39                                                                    | 6573    |
| 41 | exp bariatric surgery/                                                       | 55240   |
| 42 | (bariatric surg* or gastric bypass* or gastric band* or gastric sleeve*).tw. | 55749   |
| 43 | 41 or 42                                                                     | 70079   |
| 44 | 40 not 43                                                                    | 6556    |
| 45 | malnutrition/                                                                | 70265   |
| 46 | (malnourished or malnutrition).tw.                                           | 68890   |
| 47 | 45 or 46                                                                     | 96231   |
| 48 | 44 not 47                                                                    | 6341    |
| 49 | exp foreign body/                                                            | 45390   |
| 50 | foreign body ingestion.tw.                                                   | 1369    |
| 51 | button batter*.tw.                                                           | 651     |
| 52 | 49 or 50 or 51                                                               | 45709   |
| 53 | 48 not 52                                                                    | 6326    |
| 54 | exp perioperative period/ or exp perioperative care/                         | 1087442 |
| 55 | (preoperative or pre-operative).tw.                                          | 458527  |
| 56 | (perioperative or peri-operative).tw.                                        | 185011  |
| 57 | (postoperative or post-operative).tw.                                        | 844694  |
| 58 | 54 or 55 or 56 or 57                                                         | 1763091 |
| 59 | 53 not 58                                                                    | 5975    |
| 60 | limit 59 to last 10 years                                                    | 3757    |
| 61 | limit 60 to english language                                                 | 3661    |

Embase <1980 to 2023 Week 07>

Date searched: 20.02.2023

\* Searches all words that begin with stem word.

**Table S2.** Medline search syntax

| Row number | Search term (February 2013 to February 2023)                                                                                                                                                                                                                     | Number of studies |
|------------|------------------------------------------------------------------------------------------------------------------------------------------------------------------------------------------------------------------------------------------------------------------|-------------------|
| 1          | exp Child/ or exp Adolescent/                                                                                                                                                                                                                                    | 3331913           |
| 2          | teen*.tw.                                                                                                                                                                                                                                                        | 33952             |
| 3          | (pediatric* or paediatric*).tw.                                                                                                                                                                                                                                  | 422959            |
| 4          | adolescen*.tw.                                                                                                                                                                                                                                                   | 330853            |
| 5          | child*.tw.                                                                                                                                                                                                                                                       | 1571926           |
| 6          | infant*.tw.                                                                                                                                                                                                                                                      | 445185            |
| 7          | youth*.tw.                                                                                                                                                                                                                                                       | 91321             |
| 8          | juvenile*.tw.                                                                                                                                                                                                                                                    | 91123             |
| 9          | 1 or 2 or 3 or 4 or 5 or 6 or 7 or 8                                                                                                                                                                                                                             | 4226583           |
| 10         | Feeding Behavior/                                                                                                                                                                                                                                                | 91931             |
| 11         | Fasting/                                                                                                                                                                                                                                                         | 38277             |
| 12         | Eating/                                                                                                                                                                                                                                                          | 58839             |
| 13         | Meals/                                                                                                                                                                                                                                                           | 4790              |
| 14         | (eat* or feed* or fasting or meal*).tw.                                                                                                                                                                                                                          | 771796            |
| 15         | 10 or 11 or 12 or 13 or 14                                                                                                                                                                                                                                       | 854680            |
| 16         | Time Factors/                                                                                                                                                                                                                                                    | 1229173           |
| 17         | Circadian Rhythm/                                                                                                                                                                                                                                                | 76435             |
| 18         | (time* or timing* or circadian or mealtime* or meal-time* or duration* or daily or nightly or intermittent).tw.                                                                                                                                                  | 5442852           |
| 19         | 16 or 17 or 18                                                                                                                                                                                                                                                   | 6223936           |
| 20         | (Feeding Behavior/ or Fasting/ or Eating/ or exp Meals/ or (eat* or feed* or fasting or meal*).tw.) adj2 (Time Factors/ or Circadian Rhythm/ or (time* or timing* or circadian or mealtime* or meal-time* or duration* or daily or nightly or intermittent).tw.) | 69583             |
| 21         | (chrononutrition or chrono-nutrition or time-restricted feeding or time restricted feeding).tw.                                                                                                                                                                  | 503               |
| 22         | 20 or 21                                                                                                                                                                                                                                                         | 69638             |
| 23         | 9 and 22                                                                                                                                                                                                                                                         | 12837             |
| 24         | Animals/                                                                                                                                                                                                                                                         | 7236503           |
| 25         | (rat* or mice or mouse or drosophila).tw.                                                                                                                                                                                                                        | 7721720           |
| 26         | 24 or 25                                                                                                                                                                                                                                                         | 11784489          |
| 27         | 23 not 26                                                                                                                                                                                                                                                        | 8476              |
| 28         | exp "Feeding and Eating Disorders"/                                                                                                                                                                                                                              | 35628             |
| 29         | (anorexia or avoidant restrictive food intake disorder or ARFID or binge-eating disorder or bulimia or orthorexia).tw.                                                                                                                                           | 38923             |
| 30         | 28 or 29                                                                                                                                                                                                                                                         | 57585             |
| 31         | 27 not 30                                                                                                                                                                                                                                                        | 8047              |
| 32         | exp Athletes/                                                                                                                                                                                                                                                    | 19625             |
| 33         | athlete*.tw.                                                                                                                                                                                                                                                     | 62935             |
| 34         | 32 or 33                                                                                                                                                                                                                                                         | 66768             |
| 35         | 31 not 34                                                                                                                                                                                                                                                        | 8003              |
| 36         | exp Bariatric Surgery/                                                                                                                                                                                                                                           | 32588             |
| 37         | (bariatric surg* or gastric bypass* or gastric band* or gastric sleeve*).tw.                                                                                                                                                                                     | 30395             |

|    |                                                      |        |
|----|------------------------------------------------------|--------|
| 38 | 36 or 37                                             | 40188  |
| 39 | 35 not 38                                            | 7975   |
| 40 | Malnutrition/                                        | 18578  |
| 41 | (malnourished or malnutrition).tw.                   | 51638  |
| 42 | 40 or 41                                             | 58458  |
| 43 | 39 not 42                                            | 7815   |
| 44 | Foreign Bodies/                                      | 30672  |
| 45 | foreign body ingestion.tw.                           | 879    |
| 46 | button batter*.tw.                                   | 449    |
| 47 | 44 or 45 or 46                                       | 31113  |
| 48 | 43 not 47                                            | 7761   |
| 49 | exp Perioperative Care/ or exp Perioperative Period/ | 254002 |
| 50 | (preoperative or pre-operative).tw.                  | 324978 |
| 51 | (perioperative or peri-operative).tw.                | 121747 |
| 52 | (postoperative or post-operative).tw.                | 612612 |
| 53 | 49 or 50 or 51 or 52                                 | 970765 |
| 54 | 48 not 53                                            | 7426   |
| 55 | limit 54 to last 10 years                            | 3448   |
| 56 | limit 55 to english language                         | 3340   |

Ovid MEDLINE(R) <1946 to present>

Date searched: 20.02.2023

\* Searches all words that begin with stem word.

**Table S3.** PRISMA checklist

| Section and Topic       | Item # | Checklist item                                                                                                                                                                                                                                                                                       | Location where item is reported           |
|-------------------------|--------|------------------------------------------------------------------------------------------------------------------------------------------------------------------------------------------------------------------------------------------------------------------------------------------------------|-------------------------------------------|
| TITLE                   |        |                                                                                                                                                                                                                                                                                                      |                                           |
| Title                   | 1      | Identify the report as a systematic review.                                                                                                                                                                                                                                                          | Page 1                                    |
| ABSTRACT                |        |                                                                                                                                                                                                                                                                                                      |                                           |
| Abstract                | 2      | See the PRISMA 2020 for Abstracts checklist.                                                                                                                                                                                                                                                         |                                           |
| INTRODUCTION            |        |                                                                                                                                                                                                                                                                                                      |                                           |
| Rationale               | 3      | Describe the rationale for the review in the context of existing knowledge.                                                                                                                                                                                                                          | Page 2, section 1                         |
| Objectives              | 4      | Provide an explicit statement of the objective(s) or question(s) the review addresses.                                                                                                                                                                                                               | Page 2, section 1                         |
| METHODS                 |        |                                                                                                                                                                                                                                                                                                      |                                           |
| Eligibility criteria    | 5      | Specify the inclusion and exclusion criteria for the review and how studies were grouped for the syntheses.                                                                                                                                                                                          | Page 3, section 2.1                       |
| Information sources     | 6      | Specify all databases, registers, websites, organisations, reference lists and other sources searched or consulted to identify studies.<br>Specify the date when each source was last searched or consulted.                                                                                         | Page 3, section 2.2                       |
| Search strategy         | 7      | Present the full search strategies for all databases, registers and websites, including any filters and limits used.                                                                                                                                                                                 | Supplementary materials. Tables S1 and S2 |
| Selection process       | 8      | Specify the methods used to decide whether a study met the inclusion criteria of the review, including how many reviewers screened each record and each report retrieved, whether they worked independently, and if applicable, details of automation tools used in the process.                     | Page 3, section 2.3                       |
| Data collection process | 9      | Specify the methods used to collect data from reports, including how many reviewers collected data from each report, whether they worked independently, any processes for obtaining or confirming data from study investigators, and if applicable, details of automation tools used in the process. | Page 3, section 2.3                       |
| Data items              | 10a    | List and define all outcomes for which data were sought. Specify whether all results that were compatible with each outcome domain in each study were sought (e.g. for all measures, time points, analyses), and if not, the methods used to decide which results to collect.                        | Page 3, section 2.3                       |
|                         | 10b    | List and define all other variables for which data were sought (e.g. participant and intervention characteristics, funding sources).<br>Describe any assumptions made about any missing or unclear information.                                                                                      | Page 3, section 2.3                       |

| Section and Topic             | Item # | Checklist item                                                                                                                                                                                                                                                    | Location where item is reported |
|-------------------------------|--------|-------------------------------------------------------------------------------------------------------------------------------------------------------------------------------------------------------------------------------------------------------------------|---------------------------------|
| Study risk of bias assessment | 11     | Specify the methods used to assess risk of bias in the included studies, including details of the tool(s) used, how many reviewers assessed each study and whether they worked independently, and if applicable, details of automation tools used in the process. | Page 4, section 2.4             |
| Effect measures               | 12     | Specify for each outcome the effect measure(s) (e.g. risk ratio, mean difference) used in the synthesis or presentation of results.                                                                                                                               | Page 4, section 2.5             |
| Synthesis methods             | 13a    | Describe the processes used to decide which studies were eligible for each synthesis (e.g. tabulating the study intervention characteristics and comparing against the planned groups for each synthesis (item #5)).                                              | Page 4, section 2.5             |
|                               | 13b    | Describe any methods required to prepare the data for presentation or synthesis, such as handling of missing summary statistics, or data conversions.                                                                                                             | Page 4, section 2.5             |
|                               | 13c    | Describe any methods used to tabulate or visually display results of individual studies and syntheses.                                                                                                                                                            | Page 4, section 2.4             |
|                               | 13d    | Describe any methods used to synthesize results and provide a rationale for the choice(s). If meta-analysis was performed, describe the model(s), method(s) to identify the presence and extent of statistical heterogeneity, and software package(s) used.       | Page 4, section 2.5             |
|                               | 13e    | Describe any methods used to explore possible causes of heterogeneity among study results (e.g. subgroup analysis, meta-regression).                                                                                                                              | N/A                             |
|                               | 13f    | Describe any sensitivity analyses conducted to assess robustness of the synthesized results.                                                                                                                                                                      | Page 4, section 2.6             |
| Reporting bias assessment     | 14     | Describe any methods used to assess risk of bias due to missing results in a synthesis (arising from reporting biases).                                                                                                                                           | N/A                             |
| Certainty assessment          | 15     | Describe any methods used to assess certainty (or confidence) in the body of evidence for an outcome.                                                                                                                                                             | N/A                             |
| RESULTS                       |        |                                                                                                                                                                                                                                                                   |                                 |
| Study selection               | 16a    | Describe the results of the search and selection process, from the number of records identified in the search to the number of studies included in the review, ideally using a flow diagram.                                                                      | Page 5, Figure 1                |
|                               | 16b    | Cite studies that might appear to meet the inclusion criteria, but which were excluded, and explain why they were excluded.                                                                                                                                       | N/A                             |
| Study characteristics         | 17     | Cite each included study and present its characteristics.                                                                                                                                                                                                         | Page 8, Table 1                 |
| Risk of bias in studies       | 18     | Present assessments of risk of bias for each included study.                                                                                                                                                                                                      | Page 15, Table 3                |
| Results of individual studies | 19     | For all outcomes, present, for each study: (a) summary statistics for each group (where appropriate) and (b) an effect estimate and its precision (e.g. confidence/credible interval), ideally using structured tables or plots.                                  | Page 11, Table 2                |
| Results of syntheses          | 20a    | For each synthesis, briefly summarise the characteristics and risk of bias among contributing studies.                                                                                                                                                            | Page 13, section 3.4            |

| Section and Topic                              | Item # | Checklist item                                                                                                                                                                                                                                                                       | Location where item is reported |
|------------------------------------------------|--------|--------------------------------------------------------------------------------------------------------------------------------------------------------------------------------------------------------------------------------------------------------------------------------------|---------------------------------|
|                                                | 20b    | Present results of all statistical syntheses conducted. If meta-analysis was done, present for each the summary estimate and its precision (e.g. confidence/credible interval) and measures of statistical heterogeneity. If comparing groups, describe the direction of the effect. | Page 13, Figure 2               |
|                                                | 20c    | Present results of all investigations of possible causes of heterogeneity among study results.                                                                                                                                                                                       | Page 16                         |
|                                                | 20d    | Present results of all sensitivity analyses conducted to assess the robustness of the synthesized results.                                                                                                                                                                           | Page 14, section 3.6            |
| Reporting biases                               | 21     | Present assessments of risk of bias due to missing results (arising from reporting biases) for each synthesis assessed.                                                                                                                                                              | N/A                             |
| Certainty of evidence                          | 22     | Present assessments of certainty (or confidence) in the body of evidence for each outcome assessed.                                                                                                                                                                                  | N/A                             |
| DISCUSSION                                     |        |                                                                                                                                                                                                                                                                                      |                                 |
| Discussion                                     | 23a    | Provide a general interpretation of the results in the context of other evidence.                                                                                                                                                                                                    | Page 16                         |
|                                                | 23b    | Discuss any limitations of the evidence included in the review.                                                                                                                                                                                                                      | Page 16                         |
|                                                | 23c    | Discuss any limitations of the review processes used.                                                                                                                                                                                                                                | Page 17                         |
|                                                | 23d    | Discuss implications of the results for practice, policy, and future research.                                                                                                                                                                                                       | Page 17                         |
| OTHER INFORMATION                              |        |                                                                                                                                                                                                                                                                                      |                                 |
| Registration and protocol                      | 24a    | Provide registration information for the review, including register name and registration number, or state that the review was not registered.                                                                                                                                       | Page 2, section 2               |
|                                                | 24b    | Indicate where the review protocol can be accessed, or state that a protocol was not prepared.                                                                                                                                                                                       | Page 2, section 2               |
|                                                | 24c    | Describe and explain any amendments to information provided at registration or in the protocol.                                                                                                                                                                                      | N/A                             |
| Support                                        | 25     | Describe sources of financial or non-financial support for the review, and the role of the funders or sponsors in the review.                                                                                                                                                        | N/A                             |
| Competing interests                            | 26     | Declare any competing interests of review authors.                                                                                                                                                                                                                                   | Page 18                         |
| Availability of data, code and other materials | 27     | Report which of the following are publicly available and where they can be found: template data collection forms; data extracted from included studies; data used for all analyses; analytic code; any other materials used in the review.                                           |                                 |

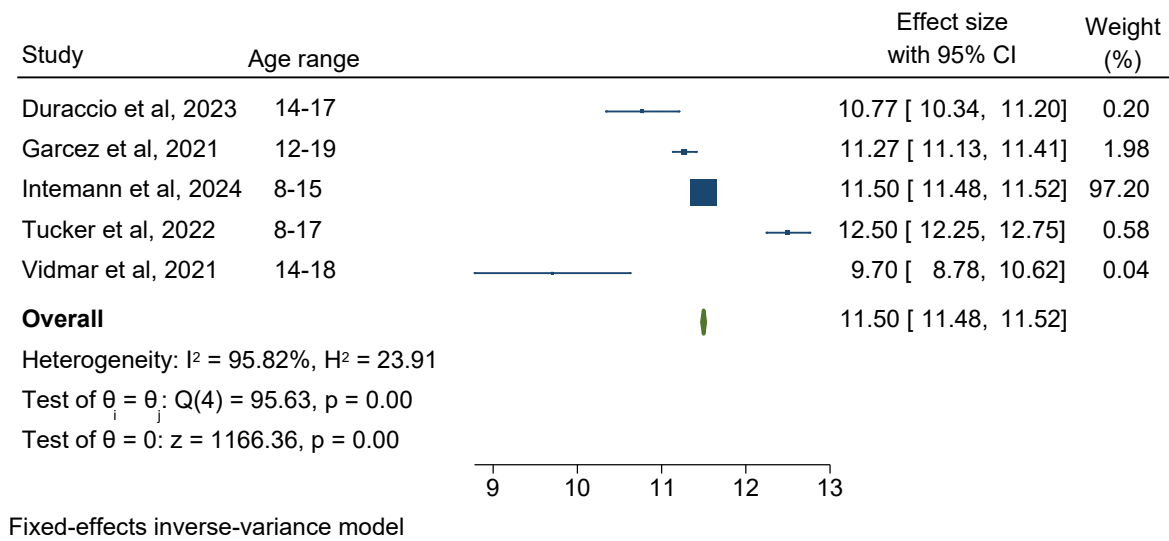

**Figure S1:** Sensitivity analysis. Fixed-effects meta-analysis of the daily eating window of children and adolescents, aged 8-19 years, within a 24-hour period [33-35, 15, 16]



A

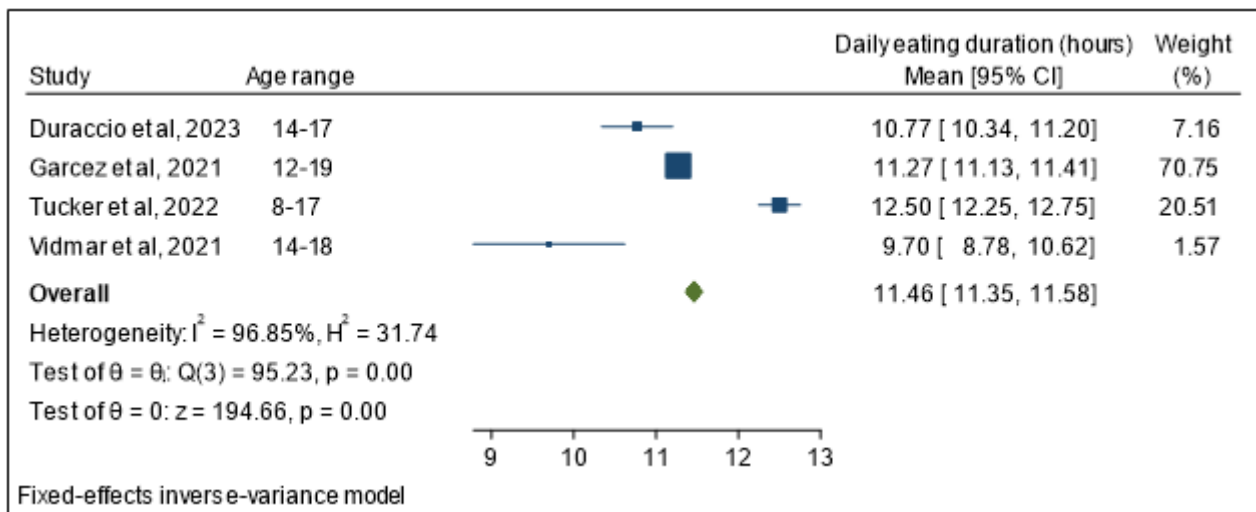

B

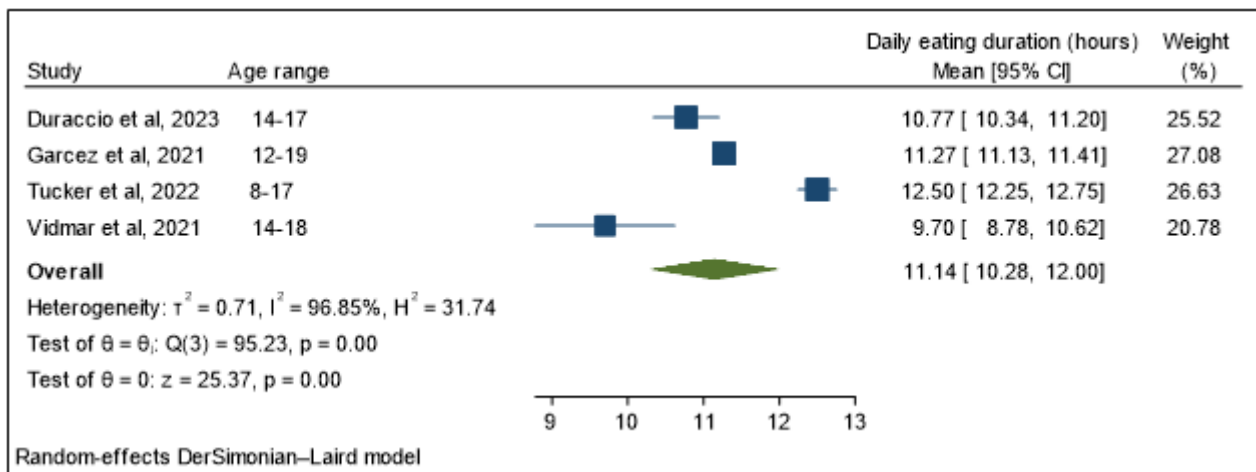

**Figure S2.** Sensitivity analysis. **A.** Fixed-effects meta-analysis of the daily eating window of children and adolescents aged 8-19 years, excluding Intemann et al study. **B.** Random-effects meta-analysis of the daily eating window of children and adolescents aged 8-19 years, excluding Intemann et al study. [33, 34, 15, 16]

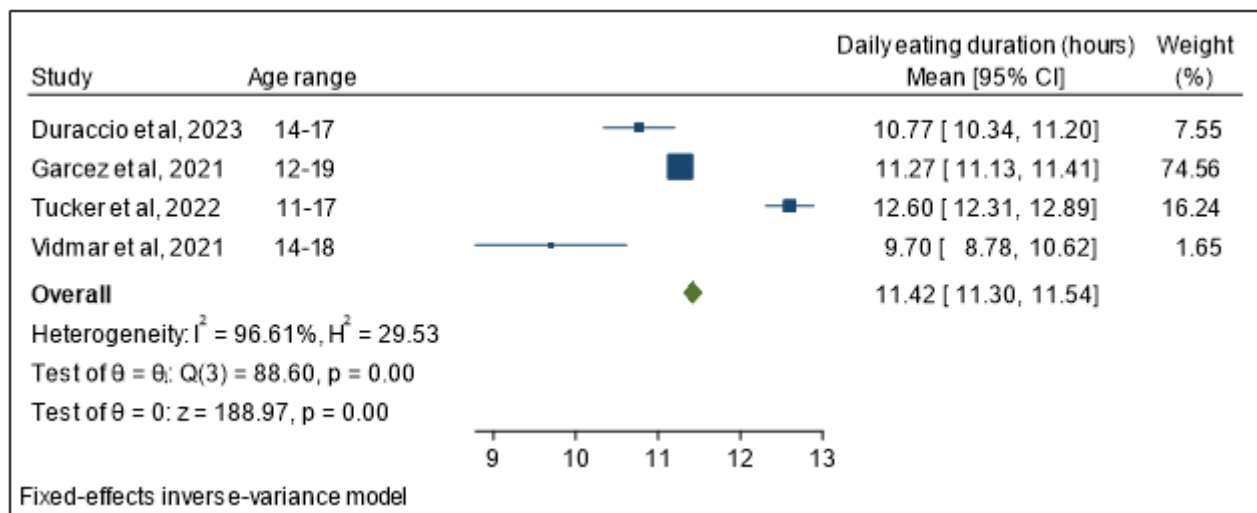

**Figure S3.** Subgroup sensitivity analysis. Fixed-effects meta-analysis of the daily eating window of adolescents aged 11-19 years. [33, 34, 15, 16]
